# Supplementary material for: Fine-scale computations for adaptive processing in the human brain
Source: eLife. 2020 Nov 10;9:e57637. doi: 10.7554/eLife.57637 (PMC7688307; doi:10.7554/eLife.57637)
Supplement: Figure 3—source data 1. [file elife-57637-fig3-data1.xlsx]

## Sheet: Figure 3
	Figure 3 - Source Data 1:		z-scored BOLD, per cortical depth, per ROI, per participant
	Figure 3A	Adaptation														Non-Adaptation
		V1			V2			V3			V4					V1			V2			V3			V4
	Participant	Deeper	Middle	Superficial	Deeper	Middle	Superficial	Deeper	Middle	Superficial	Deeper	Middle	Superficial		Participant	Deeper	Middle	Superficial	Deeper	Middle	Superficial	Deeper	Middle	Superficial	Deeper	Middle	Superficial
	1	0.387483	0.421961	0.332017	0.368976	0.297883	0.224646	0.24085	0.266859	0.248097	0.237106	0.303071	0.285524		1	0.457326	0.532414	0.448396	0.473004	0.439018	0.360135	0.336172	0.425537	0.380377	0.306095	0.408565	0.389135
	2	0.265998	0.364742	0.419407	0.152716	0.196141	0.192876	0.160428	0.206732	0.216692	0.136675	0.182244	0.190268		2	0.203848	0.313527	0.389647	0.14656	0.181794	0.197911	0.163447	0.22363	0.252753	0.0908583	0.144051	0.189929
	3	0.518152	0.573521	0.396472	0.258793	0.238876	0.181737	0.135394	0.139276	0.125276	0.0311201	0.0465625	0.0288185		3	0.600519	0.637479	0.451803	0.313754	0.309339	0.233176	0.208748	0.223539	0.183024	-0.0164486	0.00889292	0.0306339
	4	0.156306	0.162424	0.119278	0.0771268	0.127351	0.0638846	0.114013	0.0678653	0.000359946	0.0833064	0.030135	0.0466899		4	0.356086	0.384654	0.363455	0.360253	0.412631	0.315327	0.371967	0.317289	0.228113	0.286469	0.283825	0.301349
	5	0.355114	0.391915	0.340152	0.113772	0.0931578	0.10637	0.113781	0.127959	0.0851581	0.0394557	0.082821	0.0889517		5	0.390024	0.432337	0.376095	0.122552	0.13868	0.153439	0.139482	0.19038	0.140977	0.0711863	0.0902038	0.120456
	6	0.402851	0.436253	0.3762	0.134541	0.163075	0.156176	0.178223	0.216196	0.188112	0.135673	0.156963	0.165833		6	0.471562	0.520038	0.451101	0.186925	0.230712	0.259455	0.242268	0.303643	0.29646	0.200958	0.271006	0.296965
	7	0.35802	0.392615	0.373449	0.196873	0.209389	0.198123	0.207866	0.228923	0.191912	0.175192	0.152623	0.148197		7	0.42348	0.453964	0.431639	0.256847	0.27666	0.281448	0.264408	0.299976	0.28136	0.220235	0.197945	0.18038
	8	0.304928	0.306232	0.352516	0.145532	0.137411	0.129439	0.141227	0.135256	0.108477	0.127092	0.0891575	0.0744988		8	0.392367	0.426081	0.51355	0.223284	0.236705	0.209062	0.12741	0.214168	0.13549	0.112385	0.113846	0.115784
	9	0.284476	0.291249	0.282158	0.196395	0.175245	0.131459	0.127994	0.170592	0.0944817	0.132963	0.138567	0.170746		9	0.277344	0.291918	0.277774	0.204256	0.193763	0.14185	0.109536	0.160172	0.083098	0.143844	0.135082	0.145632
	10	0.265527	0.301323	0.318423	0.296037	0.290659	0.27253	0.289797	0.30282	0.281207	0.168377	0.204112	0.230183		10	0.266479	0.301236	0.326828	0.286461	0.268537	0.250637	0.273251	0.293874	0.217859	0.158229	0.21512	0.221075
	11	0.452587	0.564887	0.609958	0.488684	0.468016	0.360483	0.37076	0.393176	0.397577	0.250509	0.379441	0.435114		11	0.435038	0.549279	0.599672	0.50536	0.500985	0.391098	0.366438	0.415718	0.413745	0.234139	0.355153	0.41113
	12	0.249241	0.306723	0.379485	0.26033	0.215197	0.150881	0.219425	0.202303	0.123634	0.14921	0.181595	0.218261		12	0.312356	0.363688	0.466377	0.412896	0.355352	0.309727	0.301346	0.268241	0.219346	0.188127	0.210944	0.272157
	13	0.147908	0.147736	0.154527	0.150267	0.113759	0.056	0.164145	0.161717	0.122842	0.259066	0.319238	0.283969		13	0.251101	0.297813	0.346883	0.233721	0.221537	0.209276	0.252255	0.267652	0.240283	0.266949	0.377393	0.416101
	14	0.378597	0.40392	0.363909	0.305264	0.297085	0.206401	0.282447	0.27402	0.206166	0.288223	0.271828	0.199701		14	0.42937	0.470924	0.436987	0.386324	0.390637	0.286787	0.355503	0.387983	0.322157	0.252651	0.279569	0.2359
	15	0.479068	0.515368	0.492988	0.519765	0.517045	0.360607	0.48473	0.497793	0.391245					15	0.552162	0.588371	0.557321	0.759695	0.748425	0.519865	0.608462	0.671591	0.564605
	Figure 3B	Non-Adaptation minus Adaptation
		V1			V2			V3			V4
	Participant	Deeper	Middle	Superficial	Deeper	Middle	Superficial	Deeper	Middle	Superficial	Deeper	Middle	Superficial
	1	0.0698425	0.110453	0.116379	0.104027	0.141135	0.135489	0.0953217	0.158678	0.13228	0.0689897	0.105495	0.103612
	2	-0.0621505	-0.051215	-0.0297598	-0.00615515	-0.0143469	0.00503466	0.0030185	0.0168976	0.036061	-0.0458163	-0.0381928	-0.000338295
	3	0.0823671	0.0639581	0.0553312	0.0549604	0.0704632	0.0514392	0.0733539	0.0842632	0.0577486	-0.0475686	-0.0376695	0.00181545
	4	0.19978	0.22223	0.244177	0.283126	0.285281	0.251443	0.257954	0.249423	0.227753	0.203163	0.25369	0.254659
	5	0.0349099	0.0404222	0.0359428	0.00878053	0.0455218	0.0470697	0.0257004	0.0624213	0.0558184	0.0317306	0.00738283	0.0315039
	6	0.0687106	0.0837855	0.0749007	0.052384	0.0676372	0.10328	0.0640447	0.0874464	0.108348	0.0652854	0.114043	0.131132
	7	0.0654607	0.0613483	0.0581904	0.0599732	0.0672713	0.0833251	0.056542	0.0710533	0.0894484	0.0450427	0.0453225	0.032183
	8	0.0874394	0.119849	0.161034	0.0777524	0.0992945	0.0796233	-0.0138164	0.0789116	0.0270133	-0.0147069	0.0246884	0.0412853
	9	-0.00713211	0.000669588	-0.00438344	0.00786178	0.0185173	0.0103917	-0.0184578	-0.0104192	-0.0113837	0.0108813	-0.00348516	-0.0251139
	10	0.000952049	-8.68022e-05	0.00840545	-0.00957614	-0.0221219	-0.0218926	-0.0165459	-0.00894618	-0.0633484	-0.0101478	0.011008	-0.00910758
	11	-0.0175486	-0.0156084	-0.0102862	0.0166764	0.0329696	0.0306156	-0.00432124	0.0225416	0.0161673	-0.0163699	-0.0242873	-0.0239841
	12	0.0631157	0.0569648	0.086892	0.152566	0.140155	0.158846	0.081921	0.0659382	0.095712	0.0389168	0.0293488	0.0538959
	13	0.103192	0.150076	0.192356	0.0834534	0.107779	0.153276	0.0881098	0.105935	0.117441	0.00788316	0.0581559	0.132132
	14	0.0507725	0.0670035	0.0730774	0.0810605	0.0935521	0.0803862	0.0730559	0.113963	0.115991	-0.0355718	0.00774103	0.0361986
	15	0.0730939	0.0730027	0.0643323	0.239929	0.23138	0.159258	0.123732	0.173797	0.173361	0	0	0
