# Supplementary material for: Fine-scale computations for adaptive processing in the human brain
Source: eLife. 2020 Nov 10;9:e57637. doi: 10.7554/eLife.57637 (PMC7688307; doi:10.7554/eLife.57637)
Supplement: Figure 4—source data 1. [file elife-57637-fig4-data1.xlsx]

## Sheet: Figure 4
	Figure 4 - Source Data 2:		z-scored BOLD, per cortical depth, per ROI, per participant
		Adaptation								Non-Adaptation
		IPS1			IPS2					IPS1			IPS2
	Participant	Deeper	Middle	Superficial	Deeper	Middle	Superficial		Participant	Deeper	Middle	Superficial	Deeper	Middle	Superficial
	1	0.0885	0.125471	0.108216	0.0916585	0.101949	0.134613		1	0.0878111	0.121734	0.121502	0.112031	0.10402	0.144405
	2	0.092061	0.126415	0.157463	0.0682378	0.127282	0.146135		2	0.0774302	0.106622	0.128684	0.0699304	0.116386	0.133756
	3	0.0564215	0.12198	0.128551	0.0554416	0.200522	0.19916		3	0.0678123	0.13694	0.147027	0.077776	0.244992	0.22101
	4	0.153417	0.221332	0.196831	0.178511	0.242612	0.255354		4	0.188454	0.271817	0.243583	0.172359	0.254165	0.26806
	5	0.0935365	0.142099	0.149673	0.105803	0.158102	0.14683		5	0.087018	0.13525	0.141542	0.104023	0.15271	0.139
	6	0.0883148	0.196016	0.221657	0.0544816	0.0844194	0.0986426		6	0.102802	0.216965	0.236506	0.0711517	0.10957	0.123143
	7	0.157899	0.164832	0.157213	0.0971944	0.0793544	0.0695013		7	0.161367	0.169668	0.167886	0.123036	0.100769	0.111309
	8	0.0476824	0.110312	0.160919	0.0805248	0.107107	0.151354		8	0.0535498	0.0992832	0.137507	0.0805347	0.100926	0.127553
	9	0.10809	0.128798	0.123002	0.109459	0.108366	0.0841081		9	0.115418	0.127794	0.109105	0.125263	0.111695	0.0804168
	10	0.0506856	0.0706569	0.0720319	-0.00607509	0.000417419	0.0218716		10	0.0577366	0.0781833	0.0865602	0.0142491	0.0227729	0.0334376
	11	0.158454	0.200541	0.227321	0.101215	0.128551	0.149498		11	0.161182	0.204401	0.227203	0.0922878	0.120031	0.152383
	12	0.0607051	0.0567762	0.0578743	0.0946979	0.10979	0.139859		12	0.0814227	0.0753626	0.0731117	0.0732164	0.0962494	0.144243
	13	0.1436	0.176699	0.177593	0.0955267	0.139424	0.148695		13	0.162049	0.206384	0.216518	0.116136	0.16291	0.188269
	14	0.124046	0.161833	0.182668	0.158368	0.213468	0.230907		14	0.125019	0.174373	0.206863	0.168448	0.235285	0.268039
	15	0.135885	0.233058	0.27523	0.0959038	0.142535	0.189683		15	0.149974	0.247057	0.29299	0.115037	0.179041	0.239484
