# Supplementary material for: Fine-scale computations for adaptive processing in the human brain
Source: eLife. 2020 Nov 10;9:e57637. doi: 10.7554/eLife.57637 (PMC7688307; doi:10.7554/eLife.57637)
Supplement: Figure 5—source data 1. [file elife-57637-fig5-data1.xlsx]

## Sheet: Figure 5
	Figure 5 - Source Data 3:		adaptation minus non-adaptation Fisher z transformed R value, per pathway, per connection, per participant
		V1-V2		V1-V3		V1-V4		V1-IPS1
	Participant	Feedforward	Feedback	Feedforward	Feedback	Feedforward	Feedback	Feedforward	Feedback
	1	0.144712	0.0604405	0.148093	0.038786	0.144544	-0.0553371	0.185598	0.137863
	2	-0.000307327	0.0331083	-0.0906032	-0.0242822	-0.054459	-0.0292355	-0.0843184	0.0326128
	3	0.120374	0.145779	0.226312	0.207697	0.255506	-0.00229901	-0.0904168	0.0528175
	4	0.00300615	0.0778138	0.121148	0.127214	0.246934	0.137268	0.231553	0.240535
	5	0.0685379	0.0775755	0.201308	0.11521	0.14046	-0.0516379	0.0138178	0.00266463
	6	-0.0601151	0.0101947	0.0908191	-0.0102712	0.0734251	0.0557886	-0.0081377	-0.0600435
	7	0.016434	-0.152558	0.119552	-0.231275	0.127477	-0.0603653	0.0706134	0.0289959
	8	0.0589571	0.0696633	0.0100908	0.00531653	-0.0840765	-0.00161559	0.0456232	0.0793362
	9	0.0947047	0.111957	0.0616637	0.0228123	0.121013	-0.0408537	0.0902076	0.154685
	10	0.0764241	0.172634	0.0877706	0.24885	0.116952	0.235329	0.104129	0.121908
	11	-0.00112669	0.0196688	-0.0448177	-0.0629545	0.032734	0.0200924	0.0204489	0.0444044
	12	0.0308048	0.124905	0.0153133	-0.00664032	0.0203516	-0.0453532	0.0956277	0.136605
	13	-0.0860741	-0.0685003	-0.0505908	-0.0977682	-0.0647015	-0.0236642	-0.17338	-0.020274
	14	0.0374911	-0.0305174	-0.000873221	-0.0774317	0.0268463	0.135667	-0.00689346	-0.0120297
	15	0.0569652	0.0786349	0.0982799	0.077204	0	0	0.00768839	0.00553889
