# Supplementary figures and images for: Fine-scale computations for adaptive processing in the human brain
Source: eLife journal article supplement (doi:10.7554/elife.57637), 2020-11-10

**Figure 3 - Supplement 1**

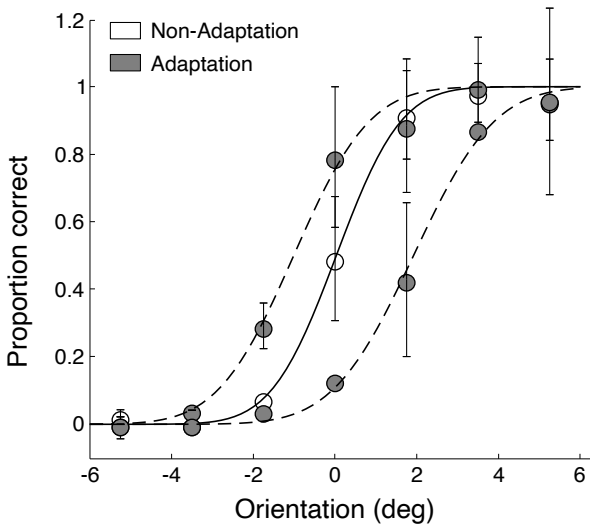

Supplement: supp [file elife-57637-supp-v1.zip]

**Figure 3 - Supplement 2**

**A**

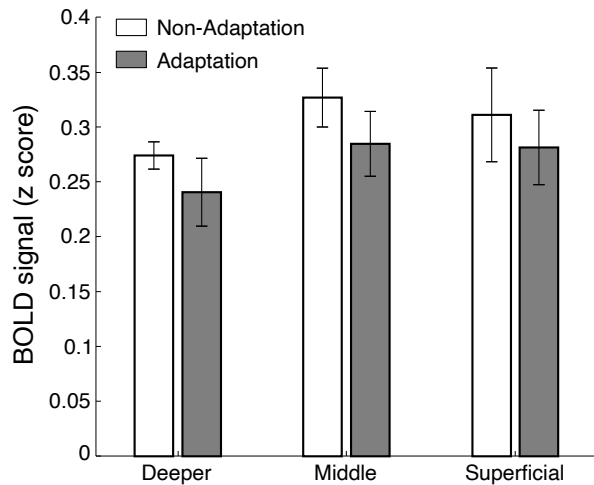

**B**

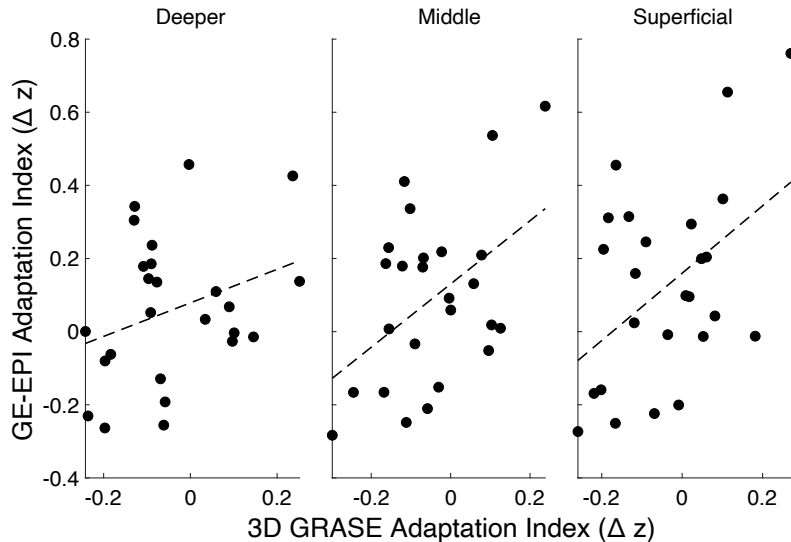

Supplement: supp [file elife-57637-supp-v1.zip]
